# Supplementary material
Source: publisher site journal article supplement (https://www.dovepress.com/article/587531)
Supplement: Supplementary file 1 [file Supplementary%20Material.docx]

**Supplementary Table 1a. BCVA of patients with moderate nuclear cataracts at each visit**

|  | Group A | Group B | P value |
| --- | --- | --- | --- |
| BCVA（logMAR） |  |  |  |
| Preoperative | 0.70±0.33 | 0.84±0.35 | 0.072 |
| Postoperative 1 D | 0.26±0.18 | 0.32±0.26 | 0.396 |
| Postoperative 1 W | 0.17±0.09 | 0.18±0.17 | 0.652 |
| Postoperative 1 M | 0.09±0.07 | 0.11±0.11 | 0.905 |
| Postoperative 3 M | 0.06±0.05 | 0.08±0.10 | 0.990 |

Data are represented as mean ± standard deviation. Mann-Whitney U-test

BCVA: best corrected visual acuity

**Supplementary Table 1b. BCVA of patients with severe nuclear cataracts at each visit**

|  | Group A | Group B | P value |
| --- | --- | --- | --- |
| BCVA（logMAR） |  |  |  |
| Preoperative | 1.06±0.52 | 1.03±0.50 | 0.954 |
| Postoperative 1 D | 0.31±0.23 | 0.39±0.29 | 0.286 |
| Postoperative 1 W | 0.19±0.13 | 0.24±0.21 | 0.243 |
| Postoperative 1 M | 0.11±0.10 | 0.14±0.13 | 0.198 |
| Postoperative 3 M | 0.09±0.09 | 0.12±0.14 | 0.236 |

Data are represented as mean ± standard deviation. Mann-Whitney U-test

BCVA: best corrected visual acuity

**Supplementary Table 2. Occlusions in the infusion system during the phacoemulsification, and more than 2 occlusions were recorded as 2 times.**

|  |  | | Occlusions Times | | | Total | P value |
| --- | --- | --- | --- | --- | --- | --- | --- |
|  |  | | 0 | 1 | 2- |
| III | | Group A | 39 | 1 | 0 | 40 |  |
|  | | Group B | 43 | 3 | 0 | 46 |  |
|  | | Total | 82 | 4 | 0 | 86 | 0.377 |
| IV-V | | Group A | 53 | 5 | 2 | 60 |  |
|  | | Group B | 41 | 13 | 7 | 61 |  |
|  | | Total | 94 | 18 | 9 | 121 | 0.020 * |

Chi-square text; *: *P*＜0.05 between groups.

**Supplementary Table 3. Cornea edema in the 2 groups 1 days and 1 week after surgery**

|  |  |  | None  （0） | Trace  （1） | Mild  （2） | Moderate  （3） | Severe  （4） | P value |
| --- | --- | --- | --- | --- | --- | --- | --- | --- |
| 1 day | III | Group A | 30 | 3 | 1 | 0 | 0 | 0.398 |
|  |  | Group B | 32 | 7 | 3 | 0 | 0 |  |
|  | IV-V | Group A | 28 | 17 | 5 | 2 | 0 | 0.033 * |
|  |  | Group B | 18 | 20 | 17 | 2 | 0 |  |
| 1 week | III | Group A | 29 | 1 | 0 | 0 | 0 | 0.245 |
|  |  | Group B | 40 | 0 | 0 | 0 | 0 |  |
|  | IV-V | Group A | 45 | 5 | 0 | 0 | 0 | 0.480 |
|  |  | Group B | 47 | 8 | 0 | 0 | 0 |  |

Chi-square text; *: *P*＜0.05 between groups.
